# Supplementary material for: Adapting machine-learning algorithms to design gene circuits
Source: PubMed Central journal article supplement (PMC6487017; doi:10.1186/s12859-019-2788-3), 2019-04-27

**A:**

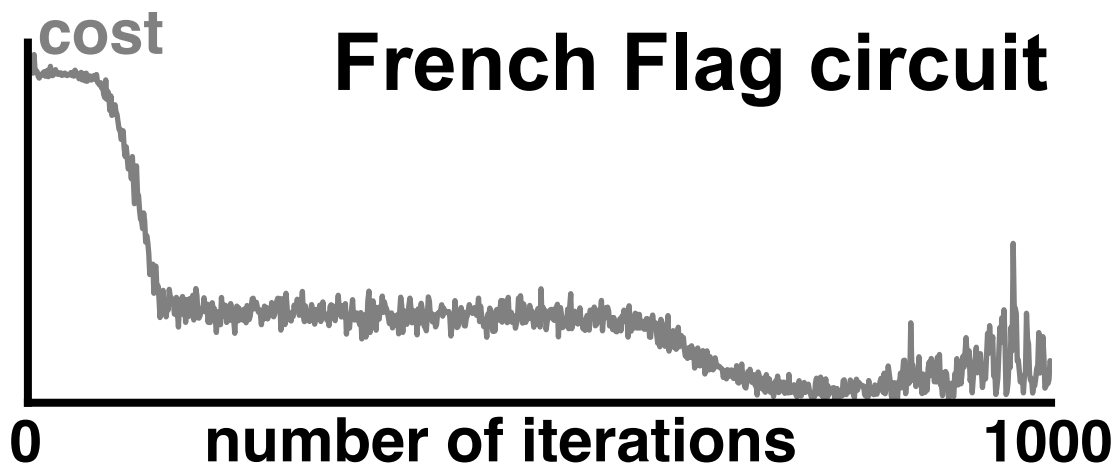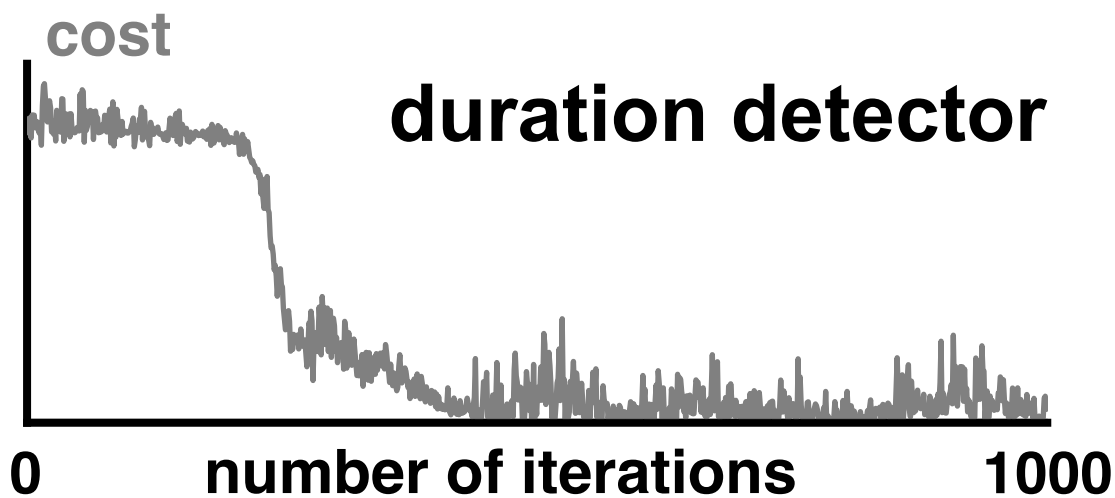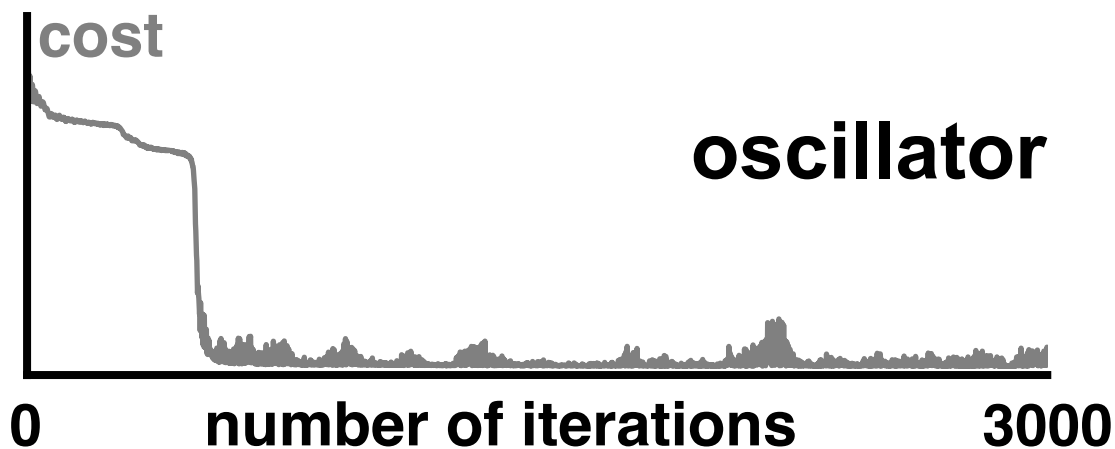

Supplement: 12859_2019_2788_MOESM1_ESM.pdf [file 12859_2019_2788_MOESM1_ESM.pdf]
